# Supplementary figures and images for: Botulinum toxin A dissolving microneedles for hyperhidrosis treatment: design, formulation and in vivo evaluation
Source: Royal Society of Chemistry journal article supplement (doi:10.1039/d3bm01301d), 2023-01-01

A

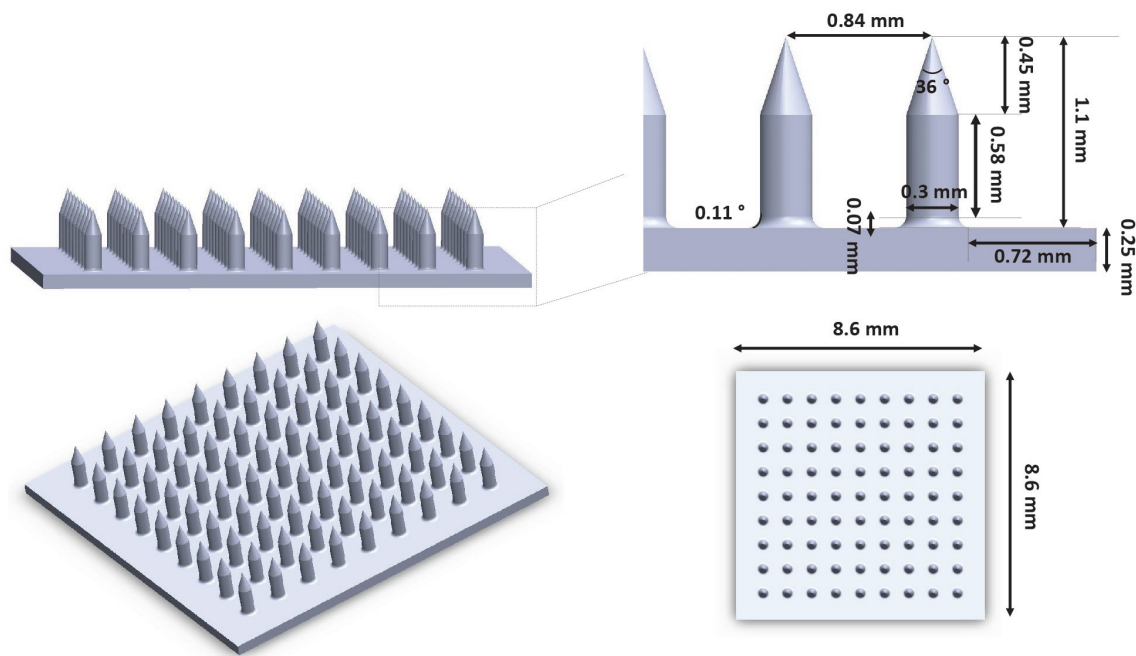

B

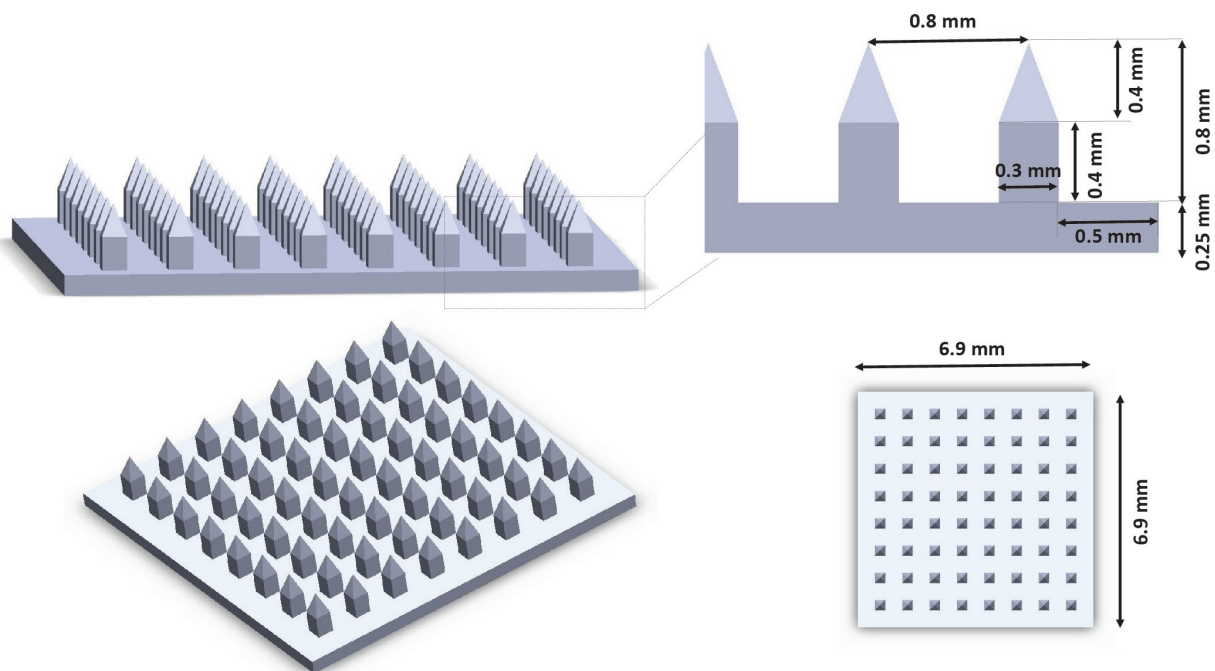

Supplement: d3bm01301d2.pdf [file d3bm01301d2.pdf]

**A**

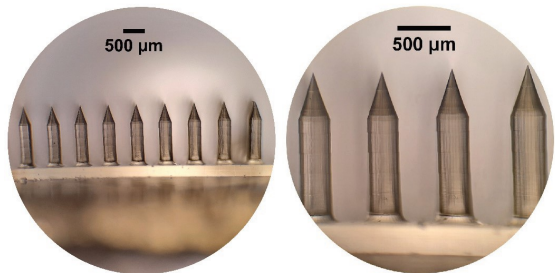

**B**

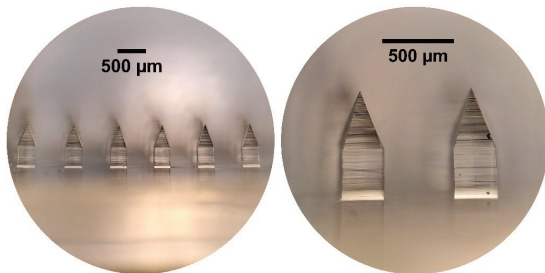

**C**

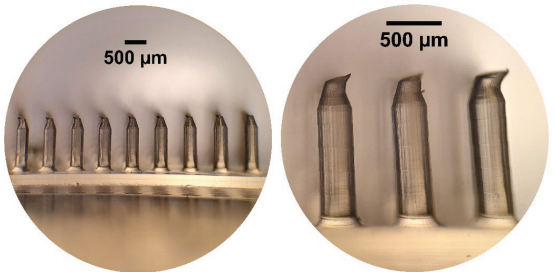

**D**

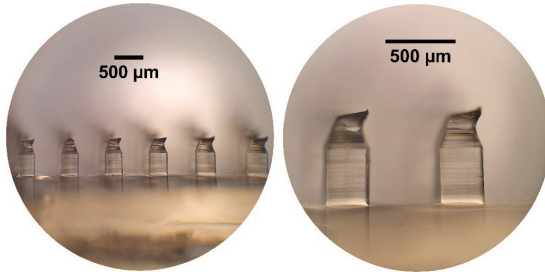

Supplement: d3bm01301d3.pdf [file d3bm01301d3.pdf]
